# Supplementary material for: A genetic toolkit for tagging intronic MiMIC containing genes
Source: eLife journal article supplement (doi:10.7554/elife.08469), 2015-06-23
Supplement: supp [file elife_poa_e08469_Figure_1_figure_supplementent_source_data_1.xlsx]

## Sheet: Sheet1
line #	Genotype	Construct	Chromosome	Phase	Tested for RMCE
1	P{ry[+t7.2]=hsFLP}12, y[1] w[*] M{vas-int.B}ZH-2A; {FRT-attB-ph0-GFSTF-attB (w+)-FRT}; Pri[1]/TM6B, Tb[1]	pW35-Frt-attB-SA-phase0-(GGS)4-EGFP-FlAsH-StrepII-TEV-3xFlag-(GGS)4-SD-attB-w+-Frt	I, II and III	0	yes
2	P{ry[+t7.2]=hsFLP}12, y[1] w[*] M{vas-int.B}ZH-2A; {FRT-attB-ph1-GFSTF-attB (w+)-FRT}; Pri[1]/TM6B, Tb[1]	pW35-Frt-attB-SA-phase1-(GGS)4-EGFP-FlAsH-StrepII-TEV-3xFlag-(GGS)4-SD-attB-w+-Frt	I, II and III	1	yes
3	P{ry[+t7.2]=hsFLP}12, y[1] w[*] M{vas-int.B}ZH-2A; {FRT-attB-ph2-GFSTF-attB (w+)-FRT}; Pri[1]/TM6B, Tb[1]	pW35-Frt-attB-SA-phase2-(GGS)4-EGFP-FlAsH-StrepII-TEV-3xFlag-(GGS)4-SD-attB-w+-Frt	I, II and III	2	yes
4	P{ry[+t7.2]=hsFLP}12, y[1] w[*] M{vas-int.B}ZH-2A; S[1]/CyO; {FRT-attB-ph0-GFSTF-attB (w+)-FRT}	pW35-Frt-attB-SA-phase0-(GGS)4-EGFP-FlAsH-StrepII-TEV-3xFlag-(GGS)4-SD-attB-w+-Frt	I, II and III	0	yes
5	P{ry[+t7.2]=hsFLP}12, y[1] w[*] M{vas-int.B}ZH-2A; S[1]/CyO; {FRT-attB-ph1-GFSTF-attB (w+)-FRT}	pW35-Frt-attB-SA-phase1-(GGS)4-EGFP-FlAsH-StrepII-TEV-3xFlag-(GGS)4-SD-attB-w+-Frt	I, II and III	1	yes
6	P{ry[+t7.2]=hsFLP}12, y[1] w[*] M{vas-int.B}ZH-2A; S[1]/CyO; {FRT-attB-ph2-GFSTF-attB (w+)-FRT}	pW35-Frt-attB-SA-phase2-(GGS)4-EGFP-FlAsH-StrepII-TEV-3xFlag-(GGS)4-SD-attB-w+-Frt	I, II and III	2	yes
7	y*w*; p{Frt-attB-ph0-GFSTF-attB-(w+)-FRT}/p{Frt-attB-ph0-GFSTF-attB-(w+)-FRT}; +/+#2	pW35-Frt-attB-SA-phase0-(GGS)4-EGFP-FlAsH-StrepII-TEV-3xFlag-(GGS)4-SD-attB-w+-Frt	II	0	no
8	y*w*; p{Frt-attB-ph1-GFSTF-attB-(w+)-FRT}/p{Frt-attB-ph1-GFSTF-attB-(w+)-FRT}; +/+#2	pW35-Frt-attB-SA-phase1-(GGS)4-EGFP-FlAsH-StrepII-TEV-3xFlag-(GGS)4-SD-attB-w+-Frt	II	1	no
9	y*w*; p{Frt-attB-ph2-GFSTF-attB-(w+)-FRT}/p{Frt-attB-ph2-GFSTF-attB-(w+)-FRT}; +/+#2	pW35-Frt-attB-SA-phase2-(GGS)4-EGFP-FlAsH-StrepII-TEV-3xFlag-(GGS)4-SD-attB-w+-Frt	II	2	no
10	y*w*; +/+; p{Frt-attB-ph0-GFSTF-attB-(w+)-FRT}/p{Frt-attB-ph0-GFSTF-attB-(w+)-FRT} #2	pW35-Frt-attB-SA-phase0-(GGS)4-EGFP-FlAsH-StrepII-TEV-3xFlag-(GGS)4-SD-attB-w+-Frt	III	0	no
11	y*w*; +/+; p{Frt-attB-ph1-GFSTF-attB-(w+)-FRT}/p{Frt-attB-ph1-GFSTF-attB-(w+)-FRT} #2	pW35-Frt-attB-SA-phase1-(GGS)4-EGFP-FlAsH-StrepII-TEV-3xFlag-(GGS)4-SD-attB-w+-Frt	III	1	no
12	y*w*; +/+; p{Frt-attB-ph2-GFSTF-attB-(w+)-FRT}/p{Frt-attB-ph2-GFSTF-attB-(w+)-FRT} #2	pW35-Frt-attB-SA-phase2-(GGS)4-EGFP-FlAsH-StrepII-TEV-3xFlag-(GGS)4-SD-attB-w+-Frt	III	2	no
