# Supplementary material for: A genetic toolkit for tagging intronic MiMIC containing genes
Source: eLife. 2015 Jun 23;4:e08469. doi: 10.7554/eLife.08469 (PMC4499919; doi:10.7554/eLife.08469)
Supplement: Supplementary file 1. — Total EGFP tagged genes created: MI: MiMIC insertion, GT: Gene Trap, PT: Protein Trap, Y/N: Yes/No, and L/V: Lethal/Viable DOI: http://dx.doi.org/10.7554/eLife.08469.007 [file elife08469s003.xlsx]

## Sheet: By cross
MI line	FBti	GT (Y/N)	Gene	FBgn	Chromosome	Donor construct chromosome	DNA phase	PT (V/L)
MI00957	FBti0132556	Y	GlyP	FBgn0004507	2	Ch3	0	V
MI00963	FBti0160248	Y	CG42732	FBgn0261698	2	Ch3	2	V
MI00996	FBti0131497	N	CG17349	FBgn0032771	2	Ch3	1	V
MI01169	FBti0149001	Y	CG10086	FBgn0037517	3	Ch2	1	V
MI01190	FBti0131741	N	CG32413	FBgn0052413	3	Ch2	0	V
MI01427	FBti0132619	Y	RhoGEF3	FBgn0264707	3	Ch2	2	V
MI01568	FBti0141067	N	stops	FBgn0086704	3	Ch2	2	V
MI01568	FBti0141067	Y	Gycbeta100B	FBgn0013973	3	Ch2	2	V
MI01574	FBti0141068	Y	CG34384	FBgn0085413	3	Ch2	0	L
MI01790	FBti0132675	N	MTA1-like	FBgn0027951	3	Ch2	1	V
MI01874	FBti0131568	Y	eys	FBgn0031414	2	Ch3	2	L
MI02112	FBti0143023	N	CG5830	FBgn0036556	3	Ch2	1	V
MI02221	FBti0131810	N	CG10426	FBgn0036273	3	Ch2	2	V
MI02467	FBti0145174	N	sfl	FBgn0020251	3	Ch2	2	V
MI02765	FBti0143129	Y	loh	FBgn0032252	2	Ch3	0	V
MI02777	FBti0143132	Y	CG6356	FBgn0039178	3	Ch2	2	V
MI03218	FBti0143290	Y	CG5535	FBgn0036764	3	Ch2	1	V
MI03390	FBti0147261	Y	CG7139	FBgn0027532	3	Ch2	0	V
MI03727	FBti0145397	Y	NKAIN	FBgn0085442	2	Ch3	2	V
MI03836	FBti0145942	Y	scb	FBgn0003328	2	Ch3	2	L
MI03838	FBti0145286	N	DIP-zeta	FBgn0051708	2	Ch3	0	V
MI03943	FBti0148038	Y	zip	FBgn0265434	2	Ch3	0	L
MI04094	FBti0145967	N	CG11576	FBgn0039882	3	Ch2	2	V
MI04101	FBti0146210	Y	Rgk3	FBgn0085426	2	Ch3	1	V
MI04721	FBti0146934	N	CG34371	FBgn0085400	2	Ch3	1	V
MI04868	FBti0146944	N	Dl	FBgn0000463	3	Ch2	1	L
MI05333	FBti0150100	Y	kay	FBgn0001297	3	Ch2	0	V
MI05804	FBti0148246	Y	CCAP-R	FBgn0039396	3	Ch2	1	V
MI06288	FBti0148561	Y	Alh	FBgn0261238	3	Ch2	0	L
MI06507	FBti0150191	Y	Cad86C	FBgn0261053	3	Ch2	2	V
MI06587	FBti0150194	Y	Gαo	FBgn0001122	2	Ch3	2	V
MI06777	FBti0149137	Y	CG42321	FBgn0259221	2	Ch3	1	V
MI07114	FBti0150689	Y	CG5656	FBgn0037083	3	Ch2	1	V
MI07336	FBti0150580	Y	twin	FBgn0011725	3	Ch2	1	L
MI07575	FBti0151514	N	l(2)gl	FBgn0002121	2	Ch3	0	V
MI07659	FBti0152204	Y	drpr	FBgn0027594	3	Ch2	1	V
MI07766	FBti0152357	Y	Nedd4	FBgn0259174	3	Ch2	0	V
MI07890	FBti0152363	Y	CG33510	FBgn0053510	2	Ch3	1	V
MI07916	FBti0160271	Y	Men-b	FBgn0029155	3	Ch2	2	V
MI07934	FBti0152710	N	Mi	FBgn0262519	3	Ch2	1	L
MI08468	FBti0152784	Y	CG42324	FBgn0259224	3	Ch2	1	V
MI08481	FBti0152787	Y	kdm2	FBgn0037659	3	Ch2	2	V
MI08520	FBti0152436	Y	PAPLA1	FBgn0031990	2	Ch3	1	L
MI08626	FBti0152453	Y	Lip1	FBgn0023496	2	Ch3	0	V
MI08698	FBti0152460	N	Sam-S	FBgn0005278	2	Ch3	1	L
MI08774	FBti0154898	N	form3	FBgn0053556	3	Ch2	2	V
MI09216	FBti0156566	Y	tws	FBgn0004889	3	Ch2	1	V
MI09447	FBti0154930	N	Pdelc	FBgn0264815	2	Ch3	2	V
MI09888	FBti0156751	N	CG9541	FBgn0032083	2	Ch3	1	V
MI09912	FBti0156753	N	Tsp42Ee	FBgn0029506	2	Ch3	0	V
MI10126	FBti0156937	N	CG13248	FBgn0036984	3	Ch2	1	V
MI10477	FBti0156980	N	CycA	FBgn0000404	3	Ch2	0	L
MI10594	FBti0160344	Y	Hrb98DE	FBgn0001215	3	Ch2	1	L
MI10698	FBti0160364	Y	a	FBgn0000008	2	Ch3	1	V
MI11015	FBti0160406	N	Sap-r	FBgn0000416	3	Ch2	2	V
MI11080	FBti0160642	Y	Vha44	FBgn0262511	2	Ch3	2	L
MI11086	FBti0160645	Y	CG14085	FBgn0036859	3	Ch2	2	V
MI11275	FBti0162080	Y	mfas	FBgn0260745	3	Ch2	2	V
MI11796	FBti0162274	Y	Nmdar1	FBgn0010399	3	Ch2	0	V
MI12194	FBti0162402	N	CG3764	FBgn0036684	3	Ch2	2	L
